# Supplementary material for: An accurate and highly efficient method for finding antioxidant chemicals from Capsicum annuum L.
Source: Royal Society of Chemistry journal article supplement (doi:10.1039/c5ay00614g), 2015-01-01

## A high efficient and accurate method for finding antioxidant chemicals from *Capsicum annuum L.*

Xiaoqian Zhang<sup>a,†</sup>, Lei Jiang<sup>b,†</sup>, Lin Ma<sup>a</sup>, Lijuan Mei<sup>b,\*</sup> and Yaozhou Zhang<sup>a,\*</sup>.

<sup>a</sup>School of Pharmaceutical Science and Technology, Tianjin University, Tianjin 300072, PR China

<sup>b</sup>Key laboratory of Tibetan medicine research, Northwest Plateau Institute of Biology, Chinese Academy of Sciences, Xining 810001, PR China

†Contributing equally to the work.

\*Corresponding author:

E-mail address: candygrape1989@hotmail.com

Telephone number: +86 022 66621537

Fax number: +86 022 66621537

### Supplementary information

**Fig. S1** The repeatability of the first dimensional preparation. The repeatability is presented by comparing the chromatography of the 1<sup>st</sup>, 5<sup>th</sup>, 10<sup>th</sup> and 15<sup>th</sup> injection.

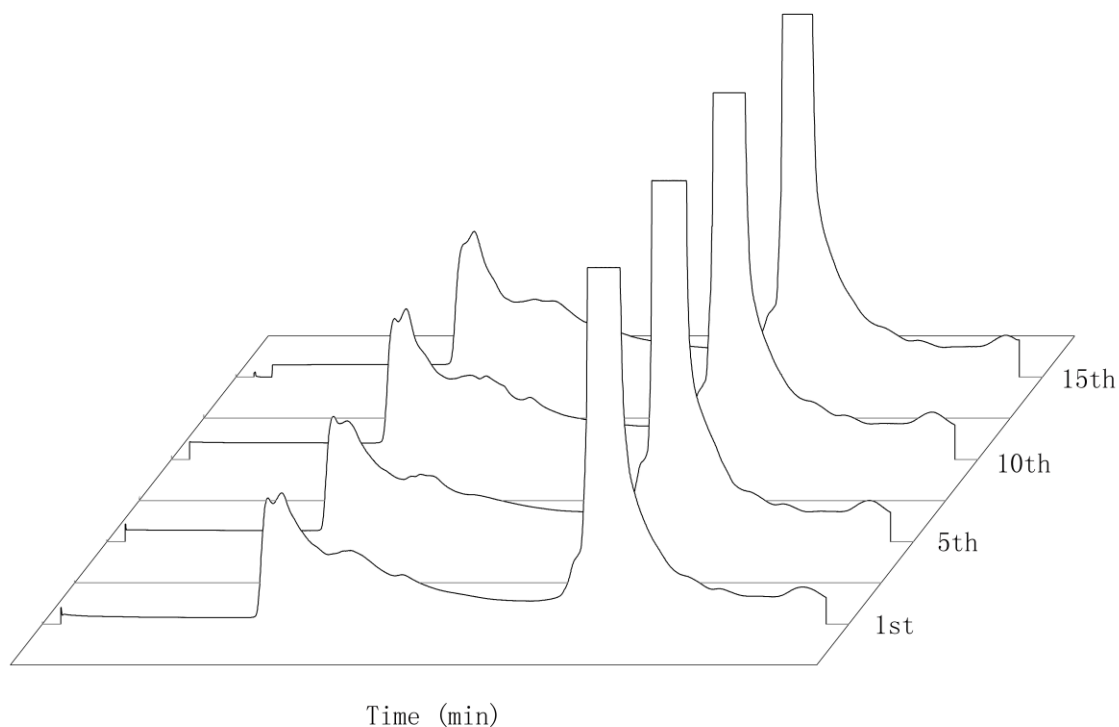

**Fig. S2** The stationary phases for four columns. (a) Amide column; (b) CN column; (c) Diol column; (d) Maltose

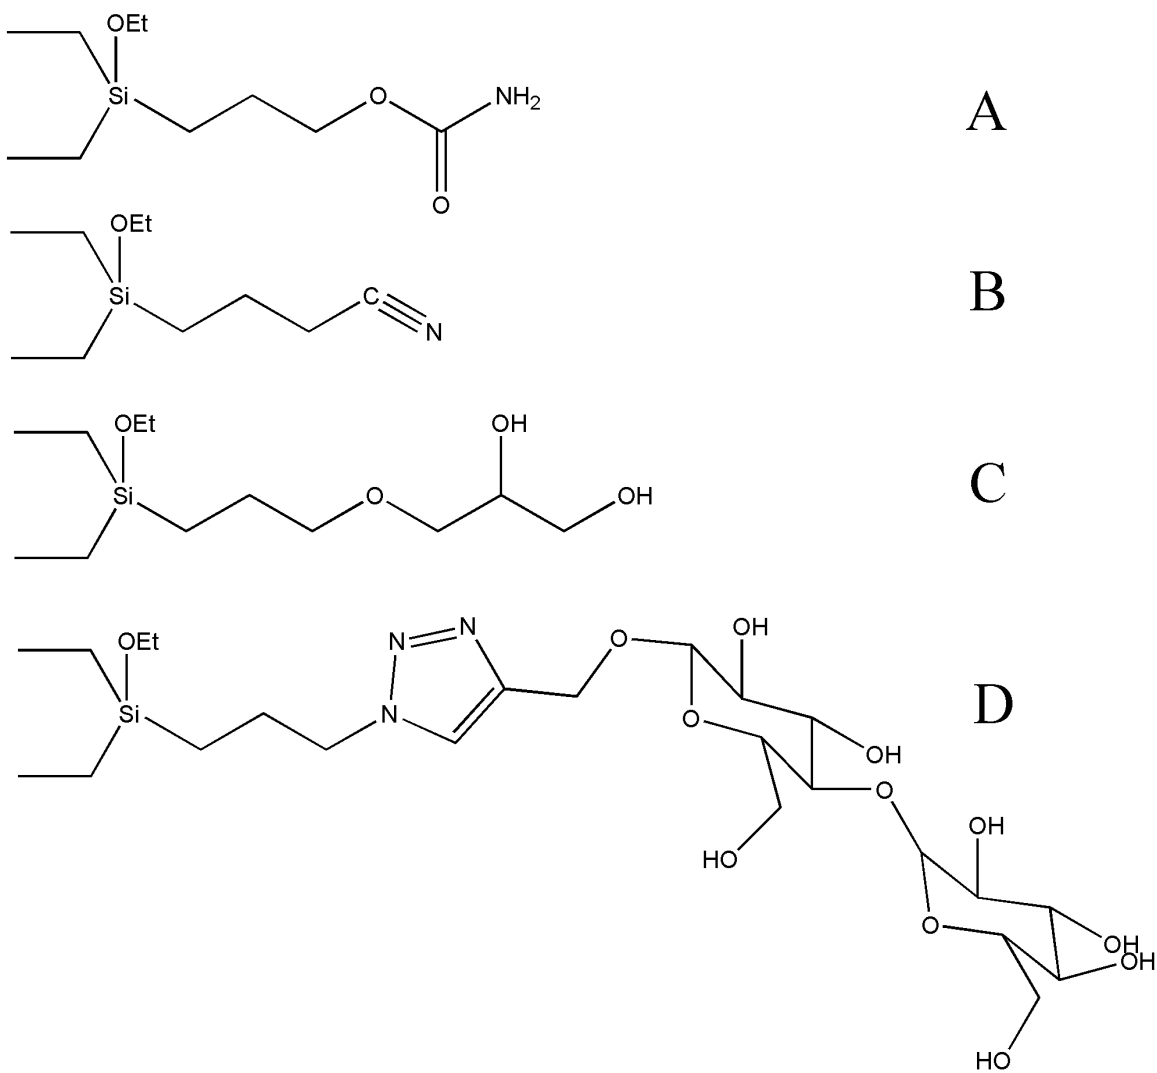

Supplement: c5ay00614g1.pdf [file c5ay00614g1.pdf]
